# Supplementary material for: 55P0110, a Novel Synthetic Compound Developed from a Plant Derived Backbone Structure, Shows Promising Anti-Hyperglycaemic Activity in Mice
Source: PLOS journal article supplement (doi:10.1371/journal.pone.0126847), 2015-05-14
Supplement: S3 (10.1371/journal.pone.0126847.s003) [file journal.pone.0126847.s003]

**S3 Table. Pharmacokinetic pilot data  
from mice treated with 100 mg/kg  
55P0110.**

At 0 min, male C57BL/6J mice received by gavage an oral dose of 100 mg/kg 55P0110. One mouse was killed for blood sampling at each indicated time interval after drug administration.

| <b>Time after Dosing<br/>(min)</b> | <b>Plasma 55P0110<br/>(<math>\mu\text{mol/l}</math>)</b> |
|------------------------------------|----------------------------------------------------------|
| 0                                  | 0.00                                                     |
| 7.5                                | 1.99                                                     |
| 15                                 | 6.19                                                     |
| 30                                 | 4.07                                                     |
| 60                                 | 4.30                                                     |
| 90                                 | 6.32                                                     |
| 180                                | 1.68                                                     |
